# Supplementary figures and images for: Extracellular Vesicle Injection Improves Myocardial Function and Increases Angiogenesis in a Swine Model of Chronic Ischemia
Source: PubMed Central journal article supplement — J Am Heart Assoc. 2018 Jun 12;7(12):e008344. doi: 10.1161/JAHA.117.008344 (PMC6220556; doi:10.1161/jaha.117.008344), 2018-06-12

# **SUPPLEMENTAL MATERIAL**

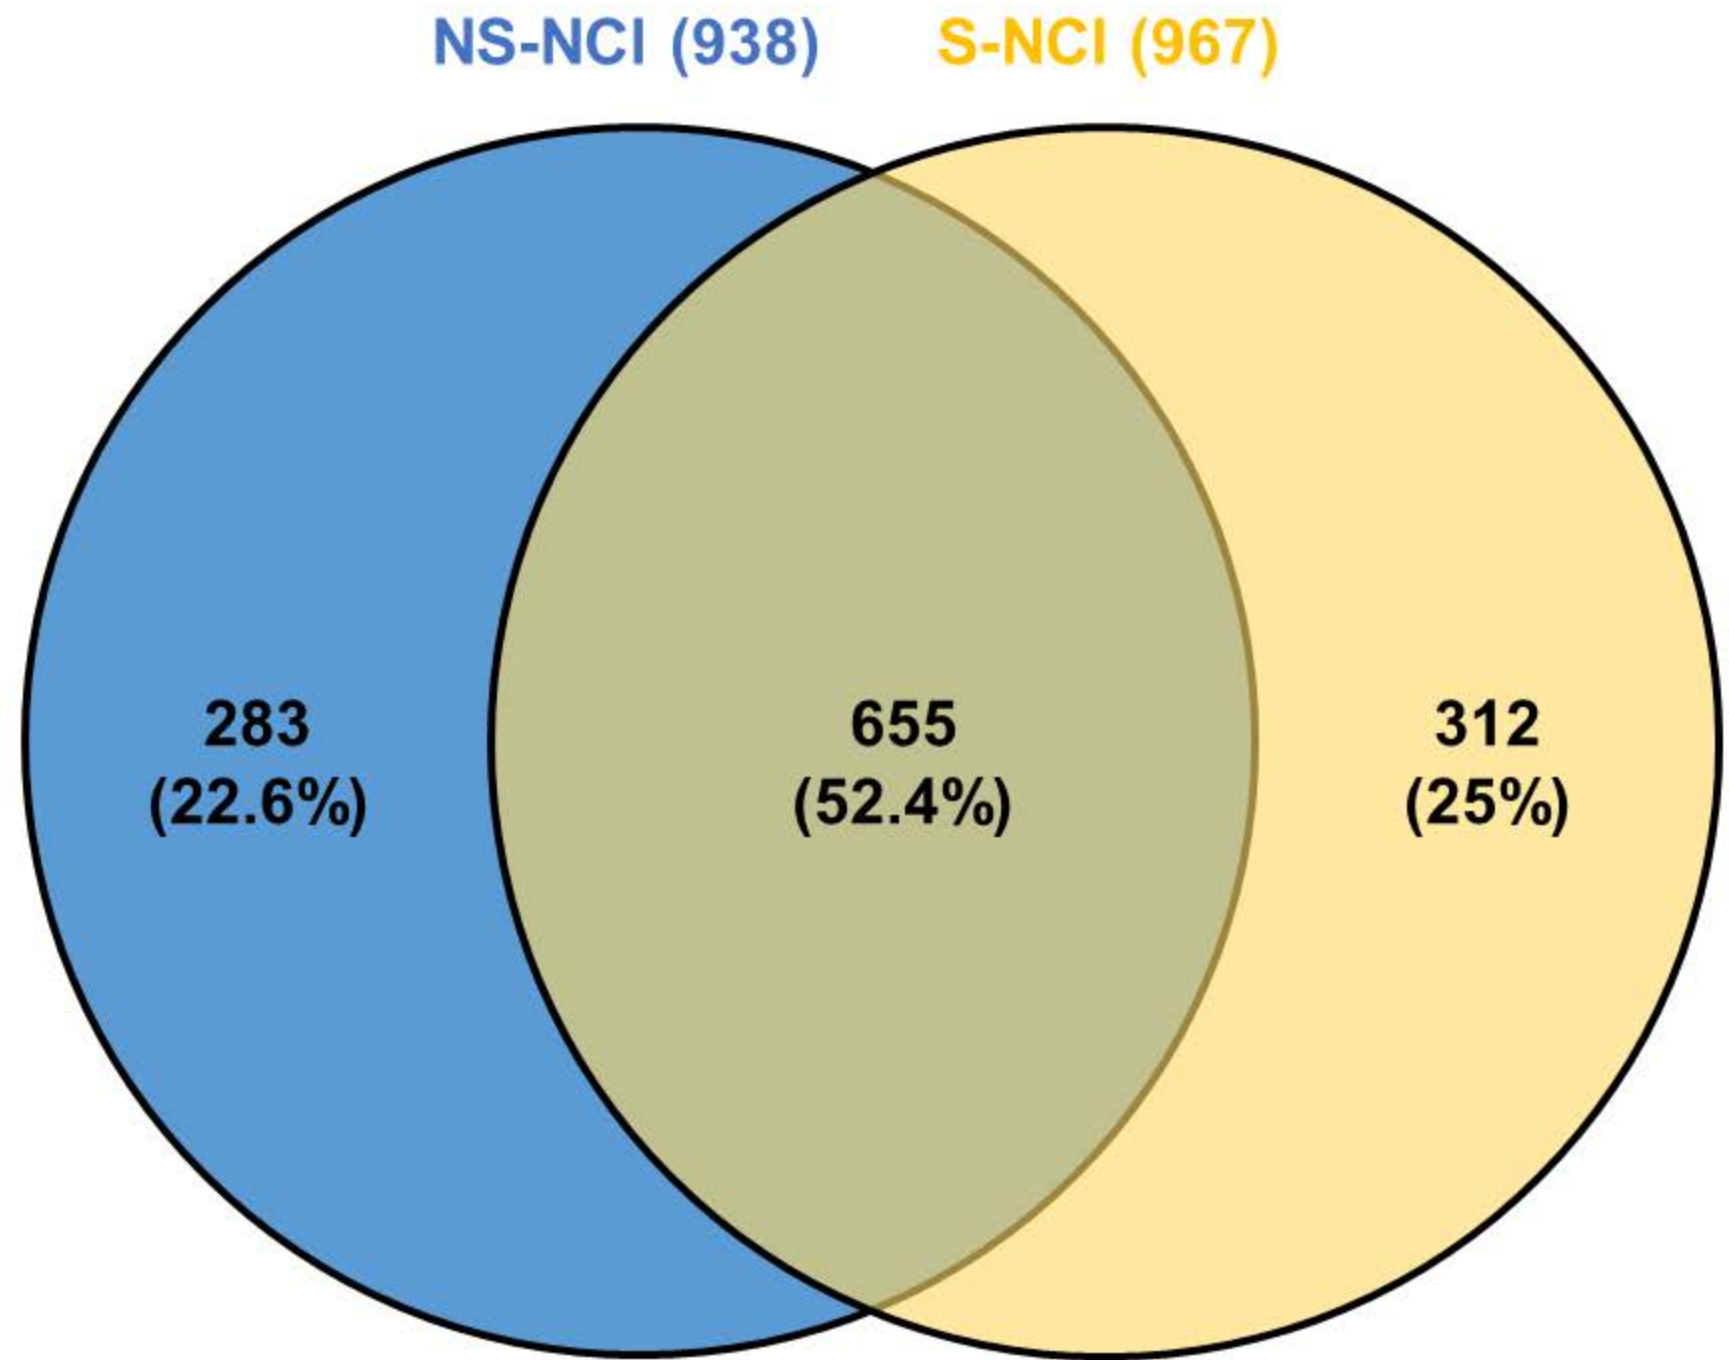

# Supplemental Figure 2A

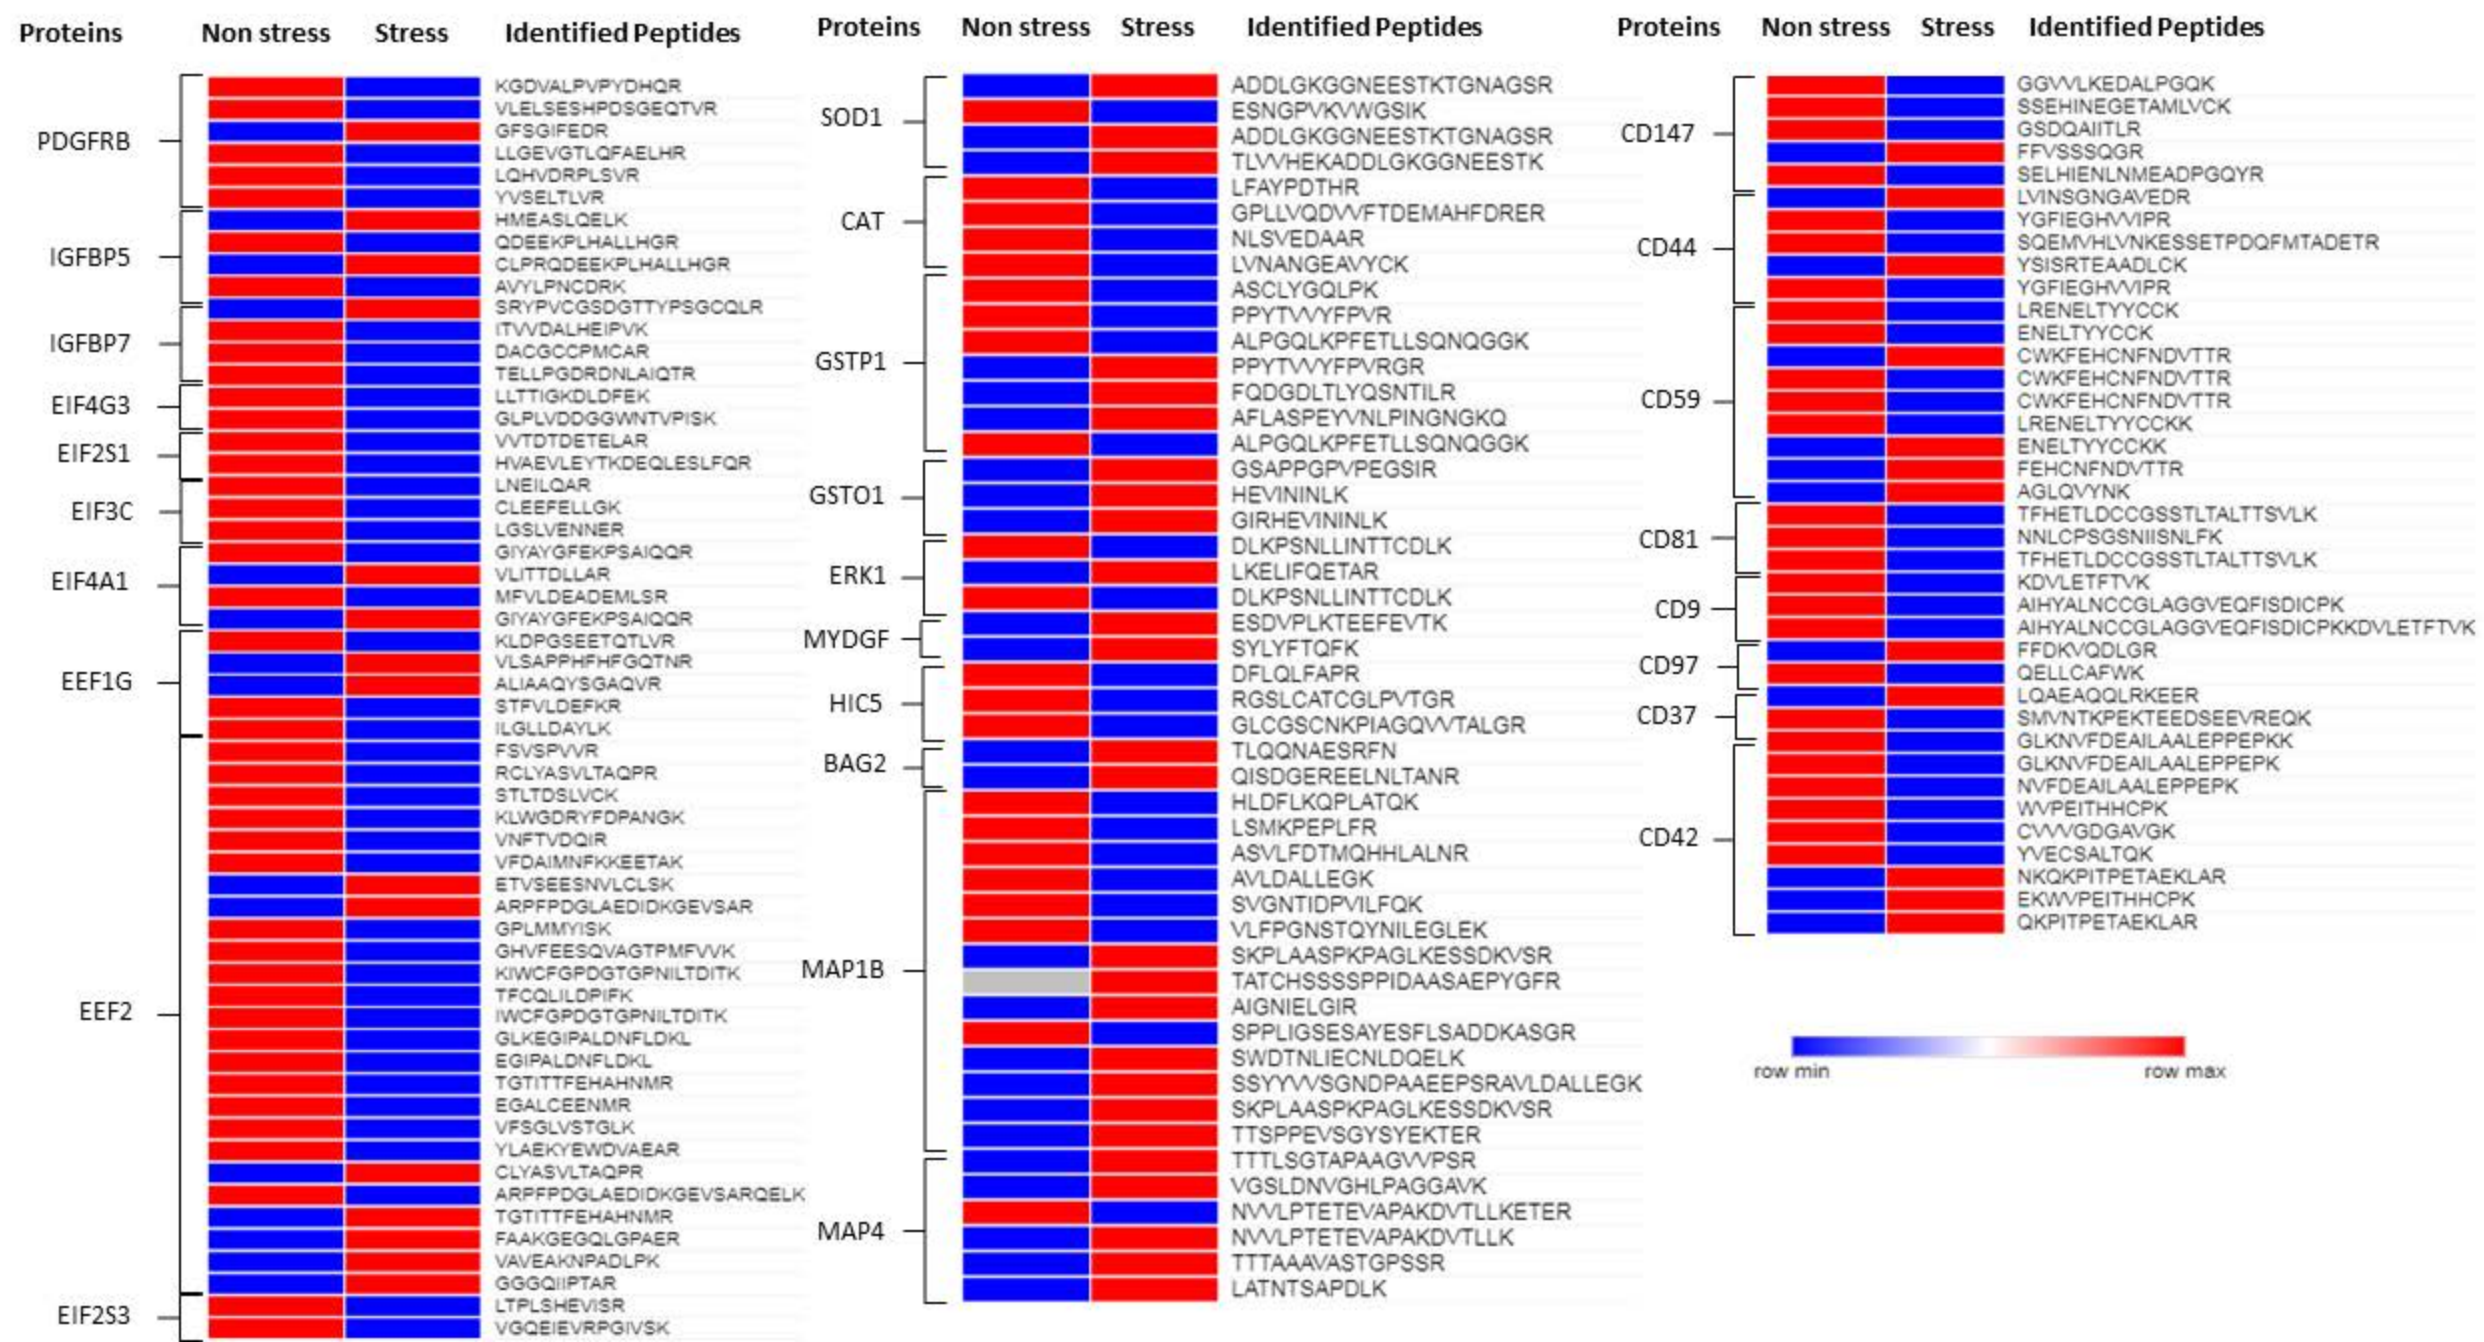

# Supplemental Figure 2B

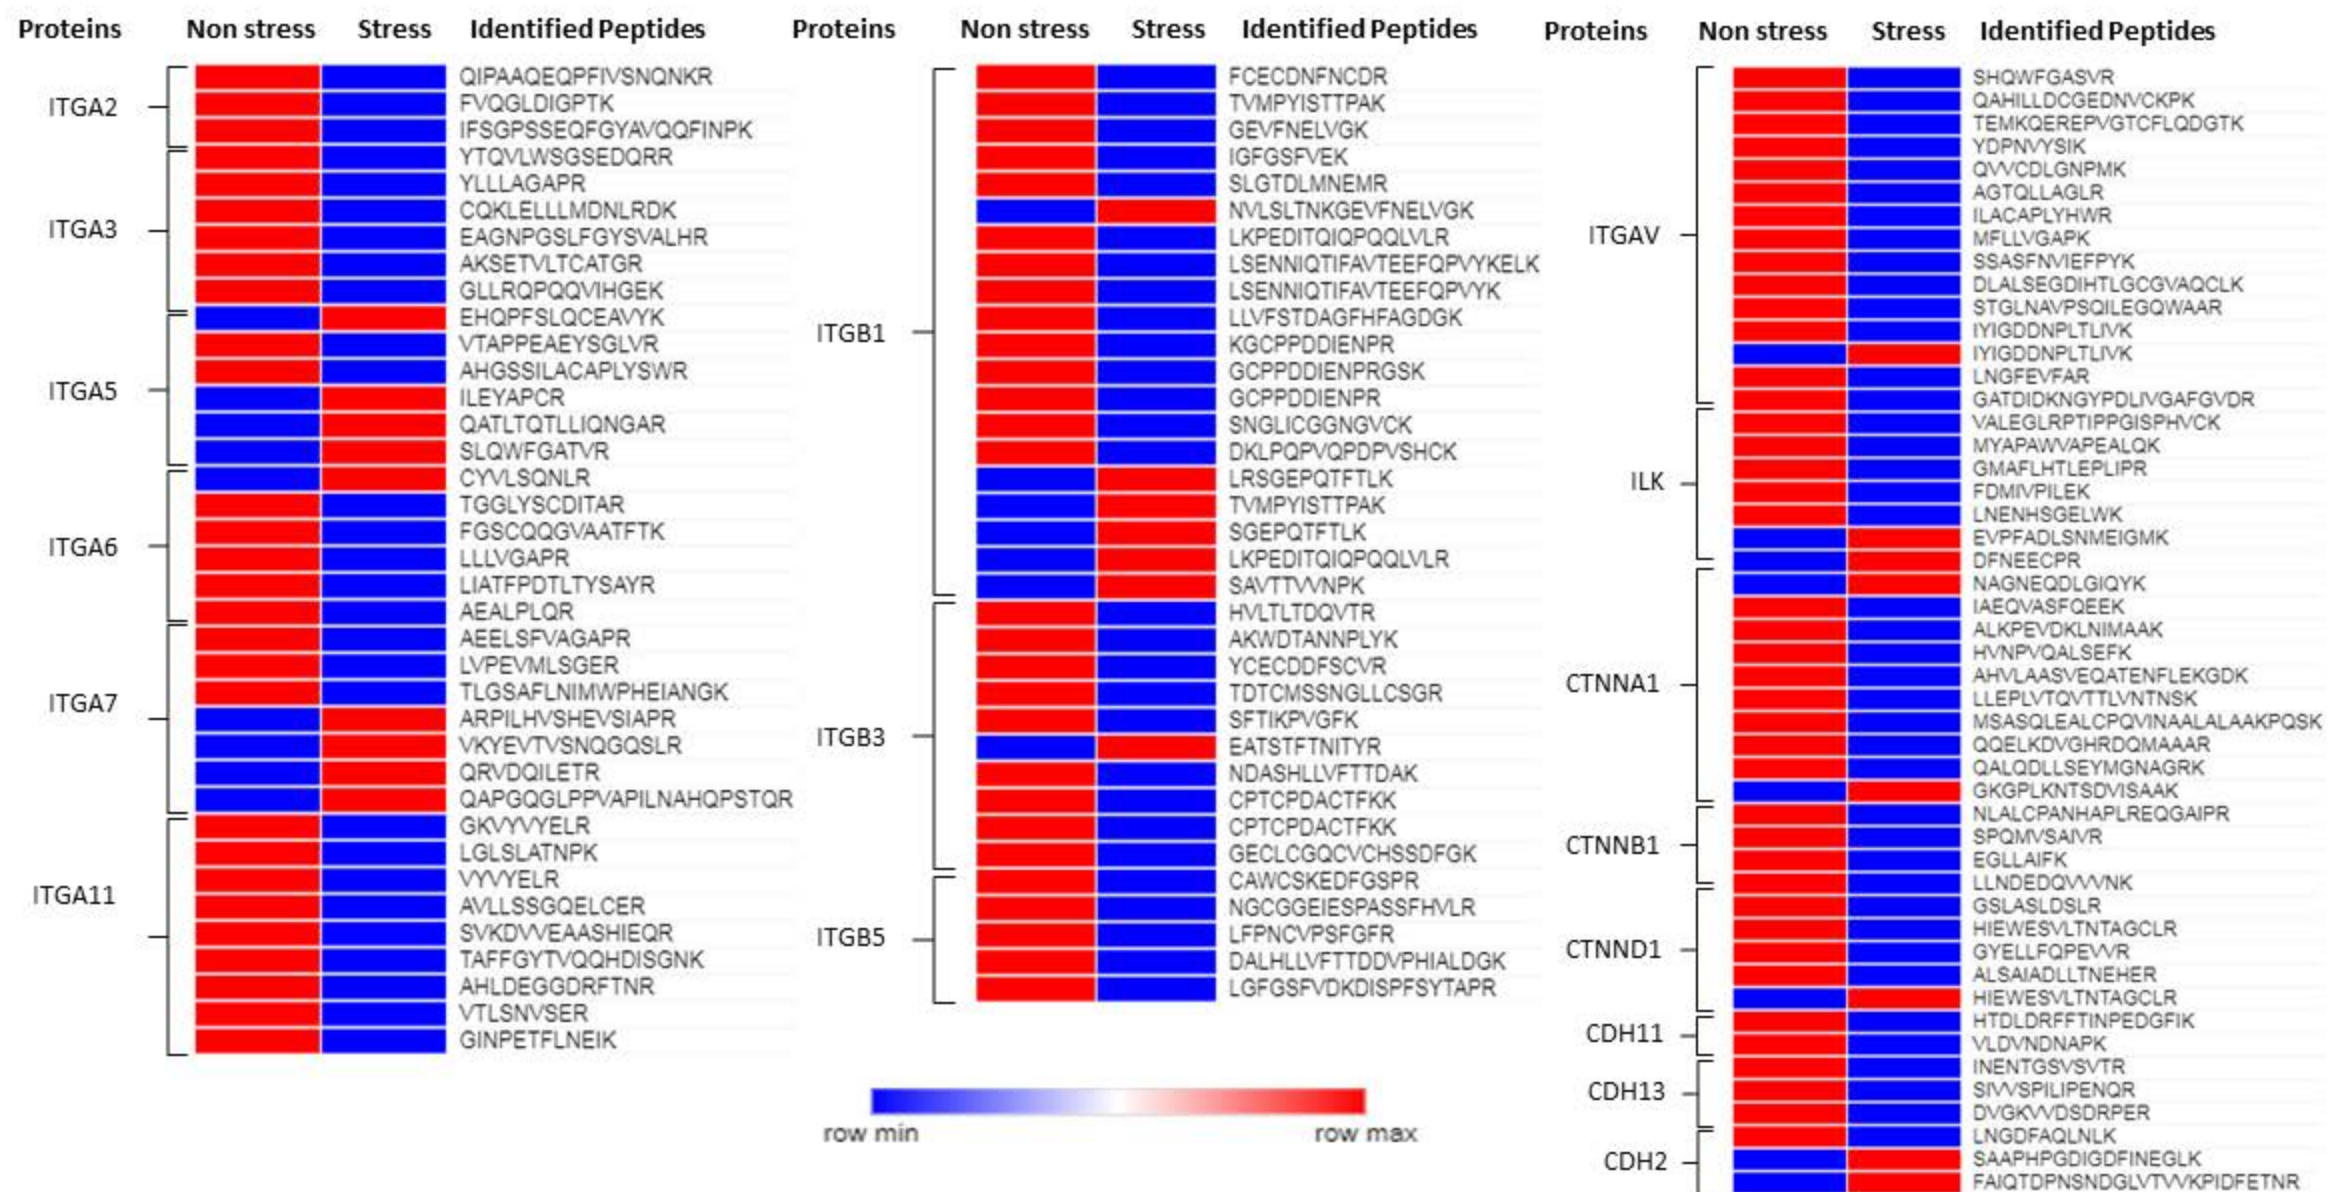

Supplement: JAH3-7-e008344-s001.pdf [file JAH3-7-e008344-s001.pdf]
